# Supplementary material
Source: publisher figshare collection journal article supplement (https://frontiersin.figshare.com/ndownloader/files/21599322)

**Suppl. Material 3** Single point measurements of: (A, B) *Microcoleus autumnalis* cover (%), (C, D) conductivity, (E, F) dissolved inorganic nitrogen (DIN), (G, H) dissolved reactive phosphorus (DRP), (I, J) temperature, and (K, L) water velocity at sites along the Hutt River, (Wellington; New Zealand) and the Cardrona River, (Otago; New Zealand). Sites are arranged along the x-axis from upstream (left) to downstream (right).

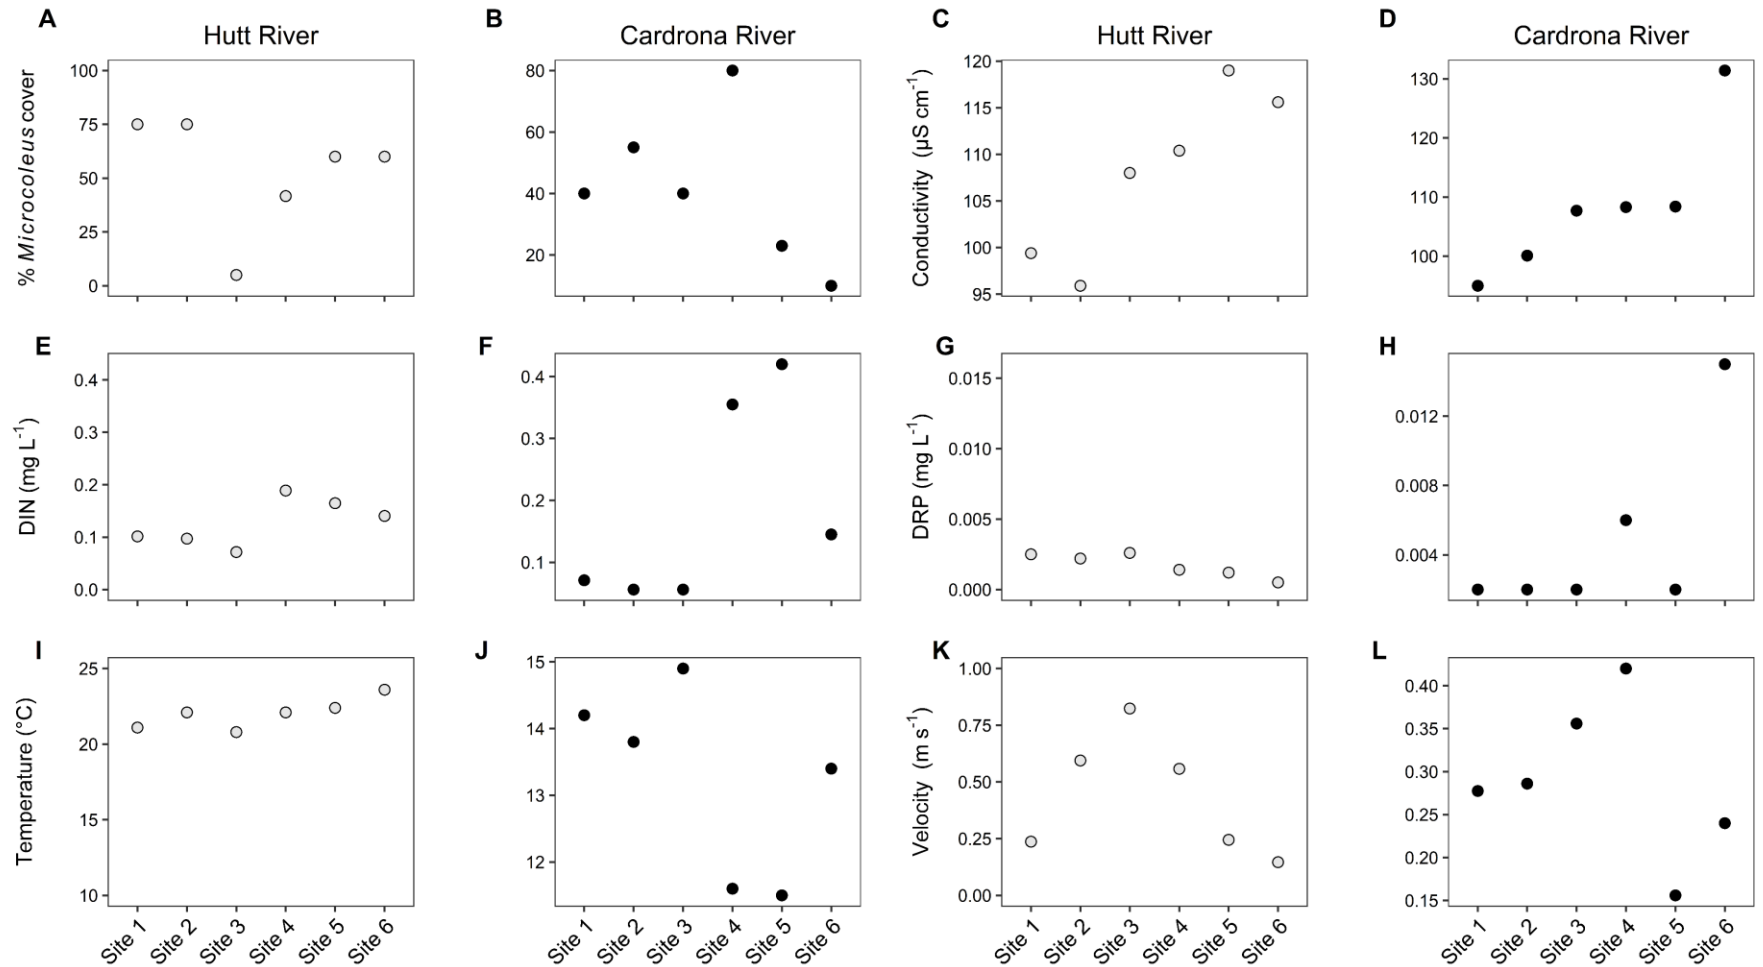

Supplement: Supplementary file [file 21599322]
